# Supplementary material for: Surfactant Protein A Impairs Genital HPV16 Pseudovirus Infection by Innate Immune Cell Activation in A Murine Model
Source: MDPI journal article supplement (doi:10.3390/pathogens8040288), 2019-12-06

Suppl. Figure 1

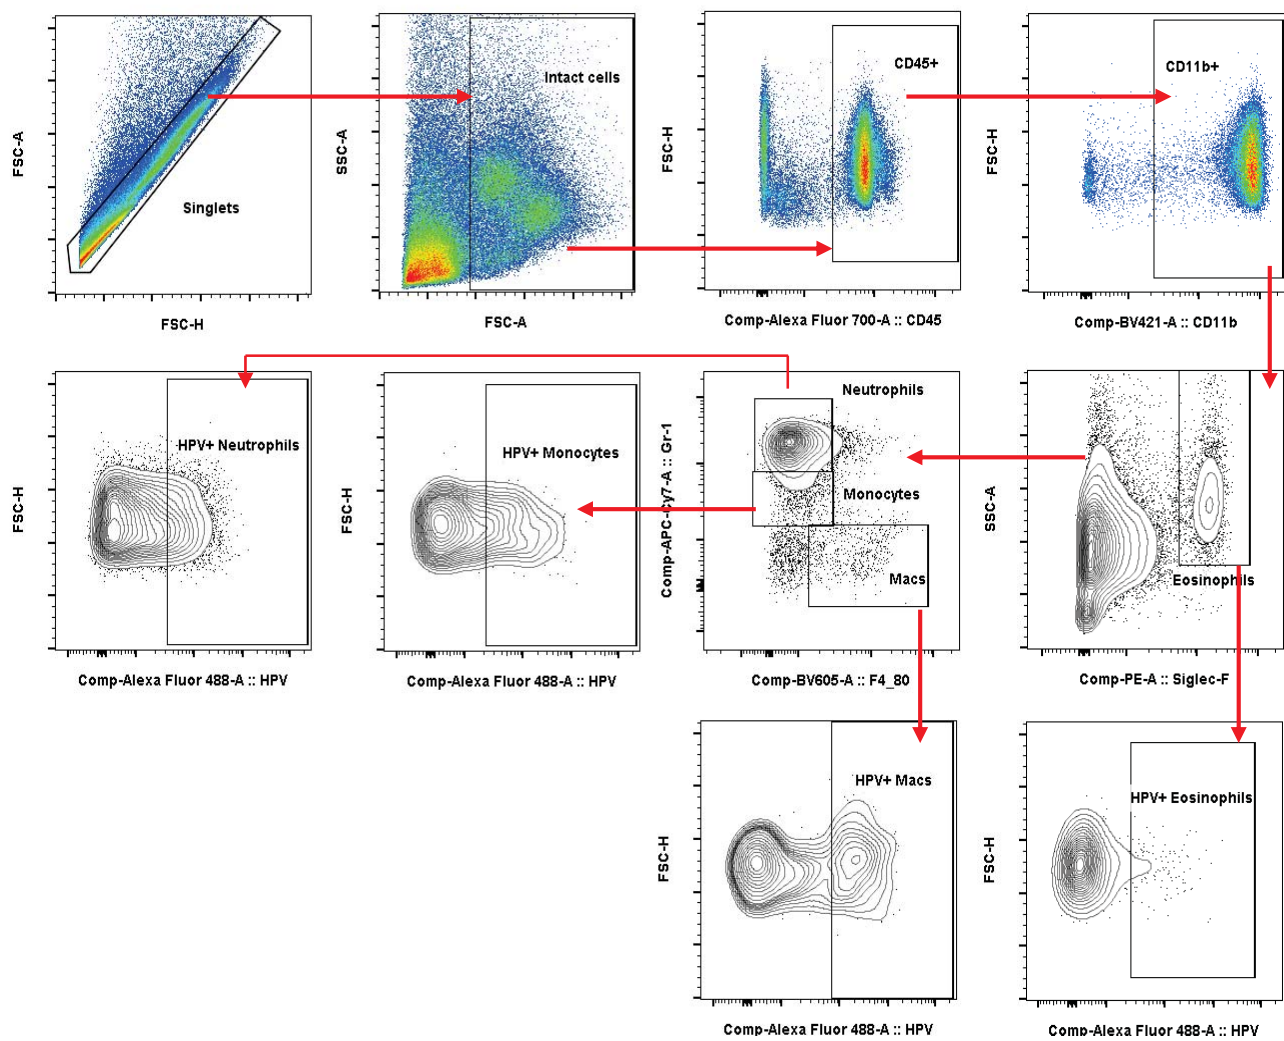

Supplement: s1 [file s1]
